# Supplementary material for: Impact of NUDT15 polymorphisms on thiopurines-induced myelotoxicity and thiopurines tolerance dose
Source: PubMed Central journal article supplement (PMC5355121; doi:10.18632/oncotarget.14594), 2017-01-11
Supplement: oncotarget-08-13575-s001.pdf [file oncotarget-08-13575-s001.pdf]

## Impact of *NUDT15* polymorphisms on thiopurines-induced myelotoxicity and thiopurines tolerance dose

### Supplementary Materials

**Supplementary Table 1: Calculation of sensitivity and specificity in all patients**

| Author [°]                | TT Genotype Counts             |                                   | CT Genotype Counts |                      | CC Genotype Counts |                      |
|---------------------------|--------------------------------|-----------------------------------|--------------------|----------------------|--------------------|----------------------|
|                           | No. Myelotoxicity <sup>a</sup> | No. No Myelotoxicity <sup>b</sup> | No. Myelotoxicity  | No. No Myelotoxicity | No. Myelotoxicity  | No. No Myelotoxicity |
| Yoichi Tanaka [14]        | 5                              | 1                                 | 13                 | 5                    | 20                 | 48                   |
| Kanhatai Chiengthong [28] | 1                              | 1                                 | 9                  | 1                    | 18                 | 52                   |
| Hisato Suzuki [26]        | 0                              | 0                                 | 10                 | 0                    | 36                 | 5                    |
| Suk-Kyun Yang [2]         | 14                             | 0                                 | 133                | 43                   | 199                | 589                  |
| Y Kakuta [22]             | 5                              | 0                                 | 10                 | 13                   | 19                 | 88                   |
| Ayumi Asada [21]          | 2                              | 0                                 | 18                 | 14                   | 25                 | 102                  |
| X. Zhu [27]               | 4                              | 0                                 | 36                 | 17                   | 25                 | 171                  |

<sup>a</sup>the number of patients with myelotoxicity.

<sup>b</sup>the number of patients without myelotoxicity.

\*numbers in the brackets represent the references in the manuscript.

**Supplementary Table 2: Calculation of sensitivity and specificity separately in early and late myelotoxicity patients**

| Author [°]                | Myelotoxicity | TT Genotype Counts             |                                   | CT Genotype Counts |                      | CC Genotype Counts |                      |
|---------------------------|---------------|--------------------------------|-----------------------------------|--------------------|----------------------|--------------------|----------------------|
|                           |               | No. Myelotoxicity <sup>a</sup> | No. No Myelotoxicity <sup>b</sup> | No. Myelotoxicity  | No. No Myelotoxicity | No. Myelotoxicity  | No. No Myelotoxicity |
| Yoichi Tanaka [14]        | Early         | 5                              | 1                                 | 5                  | 13                   | 12                 | 56                   |
|                           | Late          | 0                              | 1                                 | 8                  | 5                    | 8                  | 48                   |
| Suk-Kyun Yang [2]         | Early         | 14                             | 0                                 | 45                 | 131                  | 7                  | 781                  |
|                           | Late          | 0                              | 0                                 | 88                 | 43                   | 192                | 589                  |
| Y Kakuta [22]             | Early         | 5                              | 0                                 | 4                  | 19                   | 1                  | 106                  |
|                           | Late          | 0                              | 0                                 | 6                  | 12                   | 18                 | 75                   |
| Kanhatai Chiengthong [28] | Early         | 1                              | 1                                 | 2                  | 8                    | 3                  | 67                   |
|                           | Late          | 0                              | 1                                 | 7                  | 1                    | 15                 | 52                   |
| Ayumi Asada [21]          | Early         | 2                              | 0                                 | 2                  | 30                   | 2                  | 125                  |
|                           | Late          | 0                              | 0                                 | 16                 | 14                   | 23                 | 102                  |
| X. Zhu [27]               | Early         | 4                              | 0                                 | 15                 | 38                   | 8                  | 188                  |
|                           | Late          | 0                              | 0                                 | 21                 | 17                   | 17                 | 171                  |

<sup>a</sup>the number of patients with myelotoxicity.

<sup>b</sup>the number of patients without myelotoxicity.

\*numbers in the brackets represent the references in the manuscript.

**Supplementary Table 3: Quality of the included studies**

| Article                          | Bias                 |            |                           |                     |
|----------------------------------|----------------------|------------|---------------------------|---------------------|
|                                  | Phenotype Definition | Genotyping | Population Stratification | Selective Reporting |
| Yoichi Tanaka (2015) [14]        | Low                  | Low        | Low                       | Low                 |
| Suk-Kyun Yang (2014) [2]         | Low                  | Low        | Low                       | Possible            |
| D-C Liang (2015) [23]            | Low                  | Low        | Low                       | Possible            |
| Jun J. Yang (2015) [12]          | Low                  | Low        | Low                       | Possible            |
| Y Kakuta (2015) [22]             | Low                  | Low        | Low                       | Possible            |
| Kanhatai Chiengthong (2016) [28] | Possible             | Unknown    | Low                       | Low                 |
| Ayumi Asada (2016) [21]          | Low                  | Low        | Low                       | Low                 |
| Takaya Moriyama (2016) [24]      | Low                  | Low        | Low                       | Low                 |
| X. Zhu (2016) [27]               | Possible             | Low        | Low                       | Low                 |
| Swarup A. V. Shah (2016) [25]    | Low                  | Low        | Low                       | Low                 |
| Hisato Suzuki (2016) [26]        | Low                  | Low        | Possible                  | Low                 |

Abbreviations: Low = low risk of bias; Possible = possible risk of bias; Unknown = no detail information.

\*numbers in the brackets represent the references in the manuscript.

**Supplementary Table 4: Hardy–Weinberg equilibrium of rs116855232 polymorphism and thiopurines-induced myelotoxicity susceptibility**

| Article [1]                      | Ethnicity   | Case (Myelotoxicity) |     |     |          |          | Control (without Myelotoxicity) |    |     |          |          | HWE (P value) |         |
|----------------------------------|-------------|----------------------|-----|-----|----------|----------|---------------------------------|----|-----|----------|----------|---------------|---------|
|                                  |             | TT                   | CT  | CC  | T allele | C allele | TT                              | CT | CC  | T allele | C allele | Case          | Control |
| Yoichi Tanaka (2015) [14]        | Japanese    | 5                    | 13  | 20  | 30       | 154      | 1                               | 5  | 48  | 7        | 101      | 0.24          | 0.08    |
| Suk-Kyun Yang (2014) [2]         | Korean      | 14                   | 133 | 199 | 161      | 531      | 0                               | 43 | 589 | 43       | 1221     | 0.15          | 0.38    |
| Y Kakuta (2015) [22]             | Japanese    | 5                    | 10  | 19  | 20       | 48       | 0                               | 13 | 88  | 13       | 189      | 0.09          | 0.49    |
| Kanhatai Chiengthong (2016) [28] | Thai        | 1                    | 9   | 18  | 11       | 45       | 1                               | 1  | 52  | 3        | 105      | 0.92          | 0.00    |
| Ayumi Asada (2016) [21]          | Japanese    | 2                    | 18  | 25  | 22       | 68       | 0                               | 14 | 102 | 14       | 218      | 0.58          | 0.49    |
| X. Zhu (2016) [27]               | Chinese Han | 4                    | 36  | 25  | 44       | 86       | 0                               | 17 | 171 | 17       | 359      | 0.06          | 0.52    |
| Hisato Suzuki (2016) [26]        | Japanese    | 0                    | 10  | 36  | 10       | 82       | 0                               | 0  | 5   | 0        | 10       | 0.41          | NA      |

Abbreviations: HWE = Hardy–Weinberg equilibrium.

\*numbers in the brackets represent the references in the manuscript.

NA: not available.

**Supplementary Table 5: Hardy–Weinberg equilibrium of rs116855232 polymorphism and thiopurines intolerance dose**

| Article [1]                      | Ethnicity      | Case (Myelotoxicity)+Control (without Myelotoxicity) |     |     |          |          | HWE ( <i>P</i> value) |
|----------------------------------|----------------|------------------------------------------------------|-----|-----|----------|----------|-----------------------|
|                                  |                | TT                                                   | CT  | CC  | T allele | C allele |                       |
| Suk-Kyun Yang (2014) [2]         | Korean         | 14                                                   | 176 | 788 | 204      | 1752     | 0.25                  |
| D-C Liang (2015) [23]            | Taiwan Chinese | 2                                                    | 70  | 238 | 74       | 546      | 0.19                  |
| Jun J. Yang (2015) [12]          | East Asian     | 1                                                    | 10  | 50  | 12       | 110      | 0.55                  |
|                                  | Hispanic       | 1                                                    | 16  | 205 | 18       | 426      | 0.27                  |
| Y Kakuta (2015) [22]             | Japanese       | 5                                                    | 23  | 107 | 33       | 237      | 0.02                  |
| Kanhatai Chiengthong (2016) [28] | Thai           | 2                                                    | 10  | 70  | 14       | 150      | 0.05                  |
| Ayumi Asada (2016) [21]          | Japanese       | 2                                                    | 32  | 127 | 36       | 286      | 0.99                  |
|                                  | Guatemala      | 1                                                    | 18  | 162 | 20       | 342      | 0.52                  |
| Takaya Moriyama (2016) [24 ]     | Singaporean    | 1                                                    | 17  | 65  | 19       | 147      | 0.92                  |
|                                  | Japanese       | 1                                                    | 9   | 22  | 11       | 53       | 0.95                  |
| Swarup A. V. Shah (2016) [25]    | Indian         | 1                                                    | 8   | 60  | 10       | 128      | 0.25                  |
| Hisato Suzuki (2016) [26]        | Japanese       | 0                                                    | 10  | 41  | 10       | 92       | 0.44                  |

Abbreviations: HWE = Hardy–Weinberg equilibrium.

\*numbers in the brackets represent the references in the manuscript.
